# Supplementary figures and images for: Molecular insights into miRNA processing by Arabidopsis thaliana SERRATE
Source: PubMed Central journal article supplement — Nucleic Acids Res. 2011 Jun 17;39(17):7828–36. doi: 10.1093/nar/gkr428 (PMC3177193; doi:10.1093/nar/gkr428), 2011-06-17

Figure S2 Machida et al.

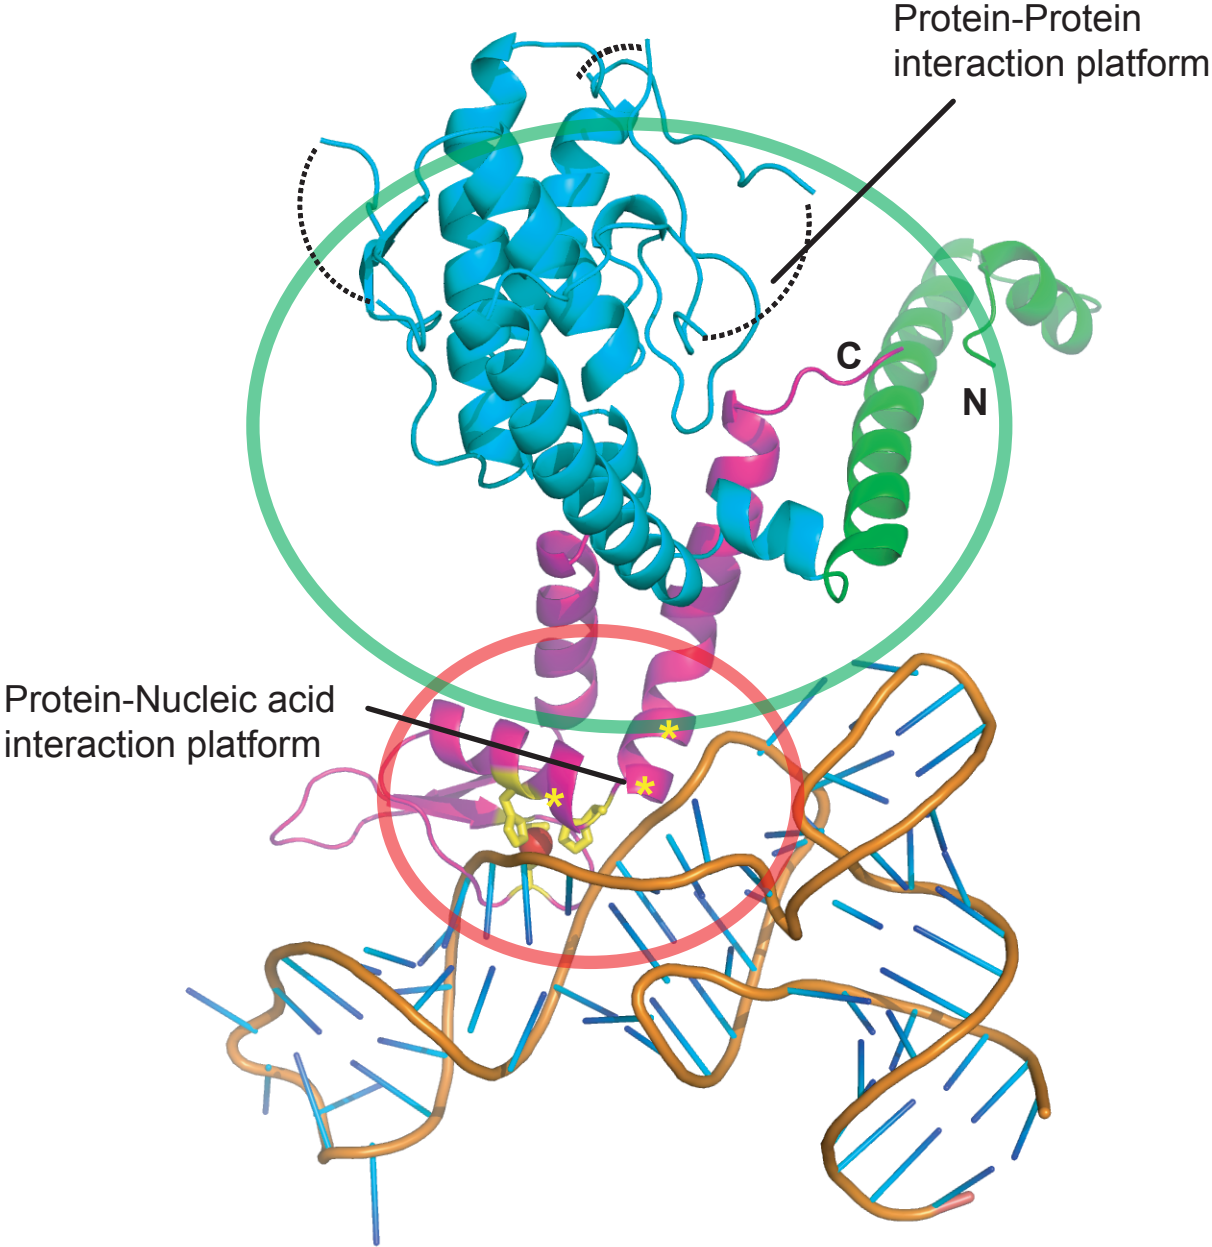

SE core/RNA complex model

Supplement: supp_gkr428_FigS2.pdf [file supp_gkr428_FigS2.pdf]
